# Supplementary material for: Relative, local and global dimension in complex networks
Source: PubMed Central journal article supplement (PMC9163155; doi:10.1038/s41467-022-30705-w), 2022-06-02
Supplement: 41467_2022_30705_MOESM1_ESM.pdf [file 41467_2022_30705_MOESM1_ESM.pdf]

# Supplementary Information: Relative, local and global dimension in complex networks

Robert L. Peach, Alexis Arnaudon, Mauricio Barahona

May 11, 2022

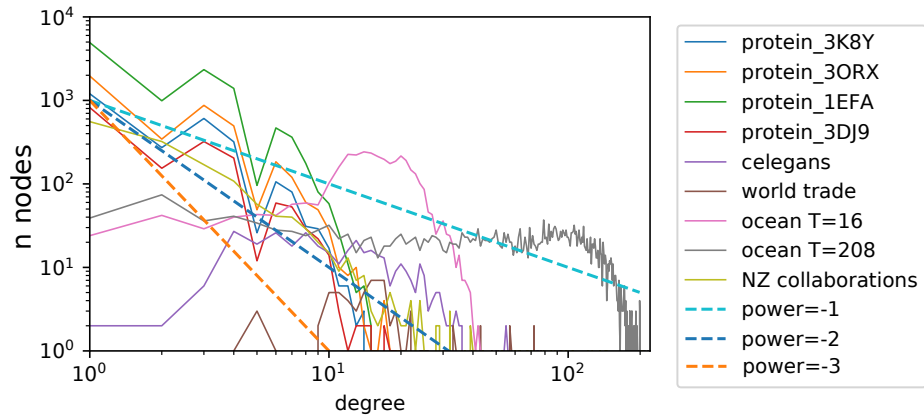

Figure S1: **Supplementary Figure 1** Degree distributions of some of the networks considered in this manuscript. Isolines corresponding to power-law distributions are shown as dashed lines.

## 1 Degree distributions

We display the degree distributions of the main networks used within this manuscript in Figure S1. Our measure of dimension is applicable to networks of any structure, including those with non-trivial topological features, namely complex networks. We find that the protein networks display a distribution that resembles a power-law, and thus can be considered to have some ‘scale-free’ properties. Other networks can be considered more homogeneous in terms of their degree distribution, including the NZ collaboration social network.

## 2 C. Elegans

Analysis of the undirected connectome (N=377) of the nematode *C. elegans* with the inclusion of muscles, important for examining control [1]<sup>1</sup>, and where scales have previously been shown as important [2]. We highlight the top 40 local dimension neurons in Table S1.

---

<sup>1</sup><https://www.wormatlas.org/neuronalwiring.html>

| Neuron | Neuron type | local dimension | z-score |
|--------|-------------|-----------------|---------|
| AVAL   | I           | 2.563           | 2.372   |
| AVBL   | I           | 2.554           | 2.304   |
| AVAR   | I           | 2.545           | 2.238   |
| AVBR   | I           | 2.543           | 2.224   |
| AVER   | I           | 2.536           | 2.171   |
| RICL   | I           | 2.520           | 2.050   |
| ADAR   | I           | 2.513           | 1.998   |
| AVDL   | I           | 2.512           | 1.988   |
| RIGL   | I           | 2.512           | 1.987   |
| AVEL   | I           | 2.509           | 1.964   |
| AVDR   | I           | 2.508           | 1.956   |
| RIS    | I           | 2.504           | 1.929   |
| RMGL   | M           | 2.494           | 1.850   |
| RICR   | I           | 2.488           | 1.807   |
| ADEL   | S           | 2.485           | 1.787   |
| RMGR   | M           | 2.482           | 1.759   |
| RIML   | M           | 2.479           | 1.739   |
| SDQR   | I           | 2.479           | 1.739   |
| RIMR   | M           | 2.475           | 1.712   |
| ADER   | S           | 2.475           | 1.712   |
| PVCL   | I           | 2.474           | 1.704   |
| AVKL   | I           | 2.470           | 1.670   |
| PVCR   | I           | 2.470           | 1.669   |
| ALA    | I           | 2.467           | 1.650   |
| AVKR   | I           | 2.460           | 1.595   |
| RIGR   | I           | 2.455           | 1.561   |
| SMDDR  | M           | 2.451           | 1.528   |
| SAAVR  | I           | 2.449           | 1.513   |
| RIAR   | I           | 2.446           | 1.493   |
| ALML   | S           | 2.441           | 1.452   |
| PVNR   | I           | 2.431           | 1.374   |
| SAAVL  | I           | 2.429           | 1.365   |
| RIBR   | I           | 2.429           | 1.361   |
| RIAL   | I           | 2.428           | 1.355   |
| RIBL   | I           | 2.427           | 1.350   |
| ADAL   | I           | 2.419           | 1.286   |
| AIZR   | I           | 2.416           | 1.267   |
| FLPR   | S           | 2.415           | 1.259   |
| PVPR   | I           | 2.415           | 1.256   |
| SABD   | I           | 2.413           | 1.243   |

Table S1: **Supplementary Table 1** The 40 neurons with the highest local dimension. The z-score is calculated in respect to the mean and standard deviation of the full set of neurons.

## Supplementary References

- [1] Gang Yan, Petra E Vértés, Emma K Towlson, Yee Lian Chew, Denise S Walker, William R Schafer, and Albert-László Barabási. Network control principles predict neuron function in the caenorhabditis elegans connectome. *Nature*, 550(7677):519–523, 2017.
- [2] Karol A. Bacik, Michael T. Schaub, Mariano Beguerisse-Díaz, Yazan N. Billeh, and Mauricio Barahona. Flow-Based Network Analysis of the Caenorhabditis elegans Connectome. *PLoS Comp. Biology*, 12(8), 2016.
